# Supplementary material for: Relationships between Isometric Force-Time Characteristics and Dynamic Performance
Source: MDPI journal article supplement (doi:10.3390/sports5030068), 2017-09-13
Supplement: s1 [file s1]

# Supplementary Materials: Relationships between Isometric Force-Time Characteristics and Dynamic Performance

Thomas Dos'Santos \*, Christopher Thomas, Paul Comfort, John J. McMahon and Paul A. Jones

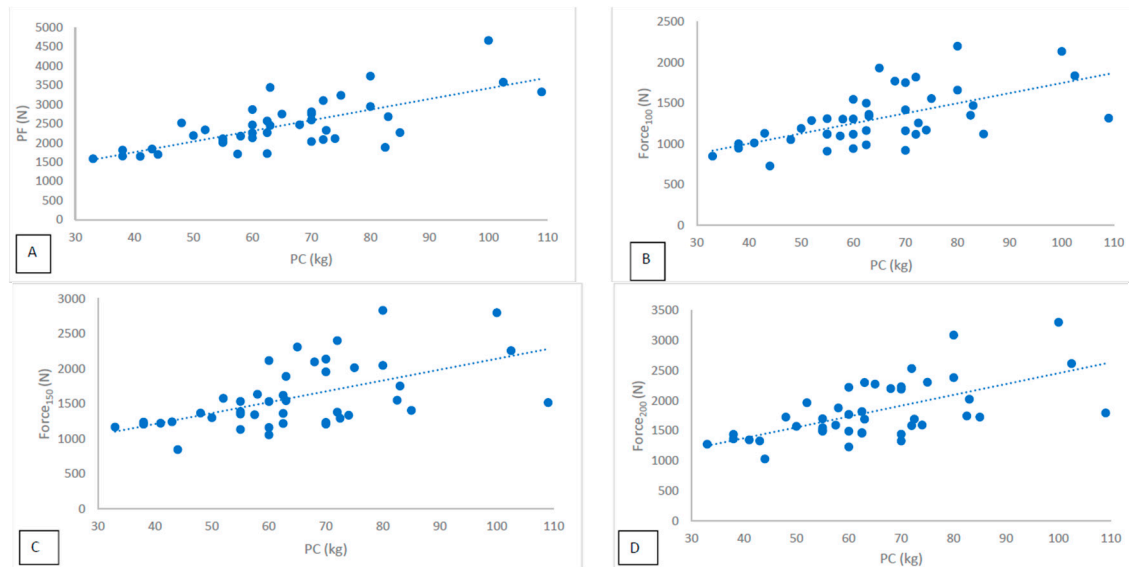

**Figure S1.** Spearman's correlation between (A) PC and PF; (B) PC and Force<sub>100</sub>; (C) PC and Force<sub>150</sub>; (D) PC and Force<sub>200</sub>.

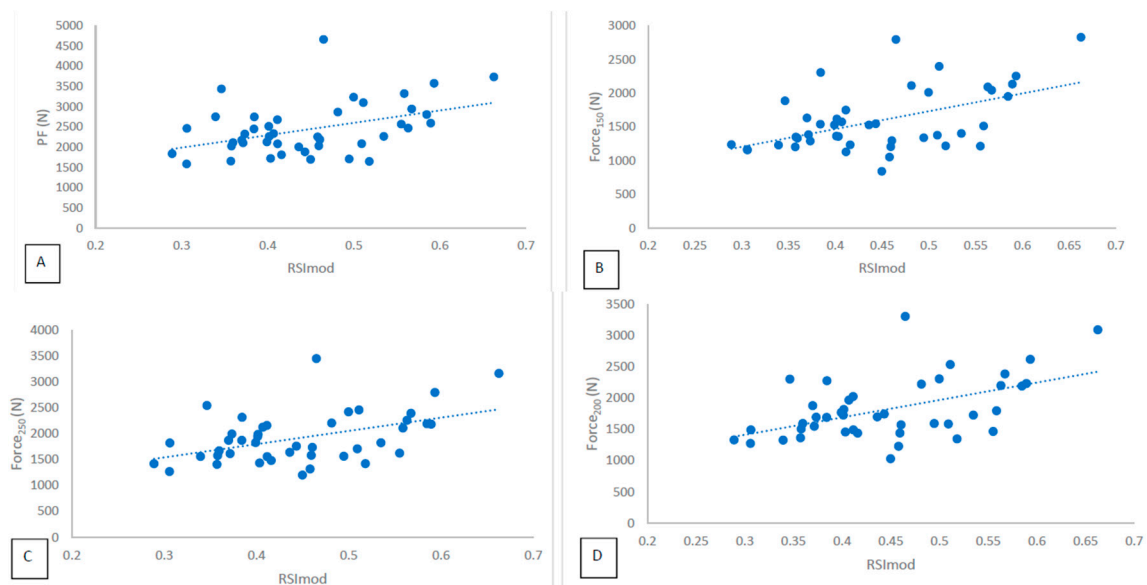

**Figure S2.** Spearman's correlation between (A) RSImod and PF; (B) RSImod and Force<sub>150</sub>; (C) RSImod and Force<sub>250</sub>; (D) RSImod and Force<sub>200</sub>.

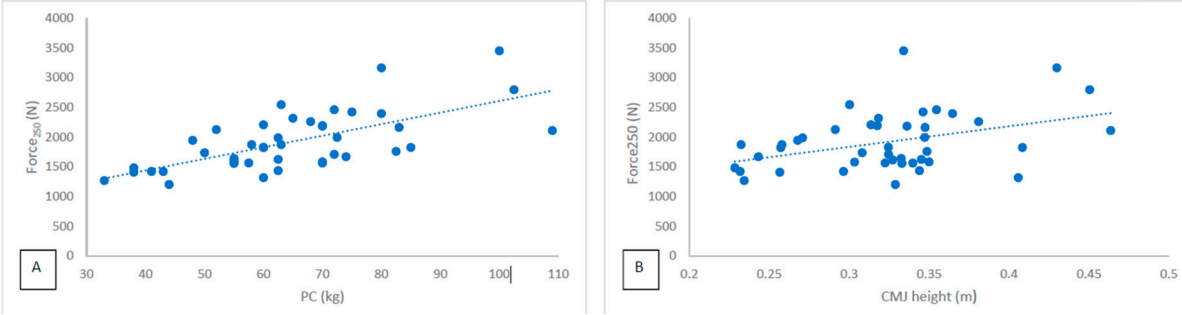

Figure S3. Spearman’s correlation between (A) PC and Force<sub>250</sub>; (B) CMJ height and Force<sub>250</sub>.
